# Supplementary material for: miR-210 Regulates Apoptotic Cell Death during Cellular Hypoxia and Reoxygenation in a Diametrically Opposite Manner
Source: Biomedicines. 2021 Dec 25;10(1):42. doi: 10.3390/biomedicines10010042 (PMC8772724; doi:10.3390/biomedicines10010042)
Supplement: Supplementary file 1 [file biomedicines-10-00042-s001.zip › biomedicines-1478683-supplementary.pdf]

## Supplementary Data and Materials

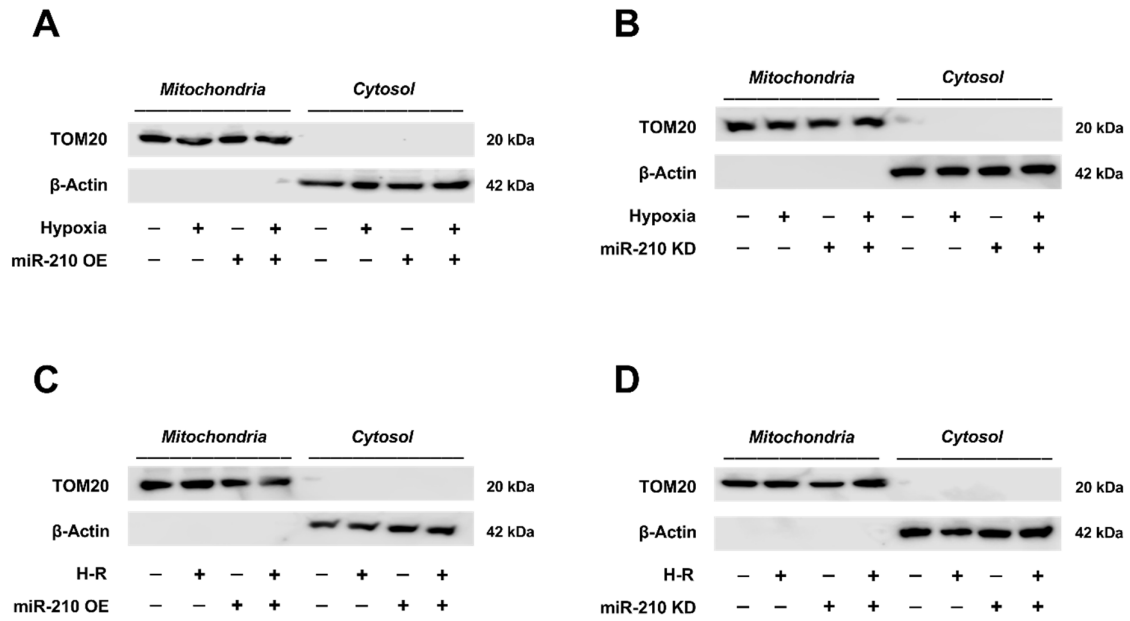

**Supplementary Figure S1: Western blot analysis determining the validity and integrity of the *mitochondrial* and *cytosolic* fractions used for the *cytochrome c* ELISA assay.** (A-D) Representative Western blots demonstrate the validity and integrity of the segregated *mitochondrial* and *cytosolic* fractions. TOM20 was used as a marker for the *mitochondrial* fractions while β-actin was used as a marker for the *cytosolic* fractions. The *loading inputs* for the *mitochondrial* fractions and the *cytosolic* fractions were set at 5 μg of protein equivalent and 20μg of protein equivalent, respectively. The origin, source, and the respective used amounts of the TOM20 and β-actin antibodies is depicted in Table 2.

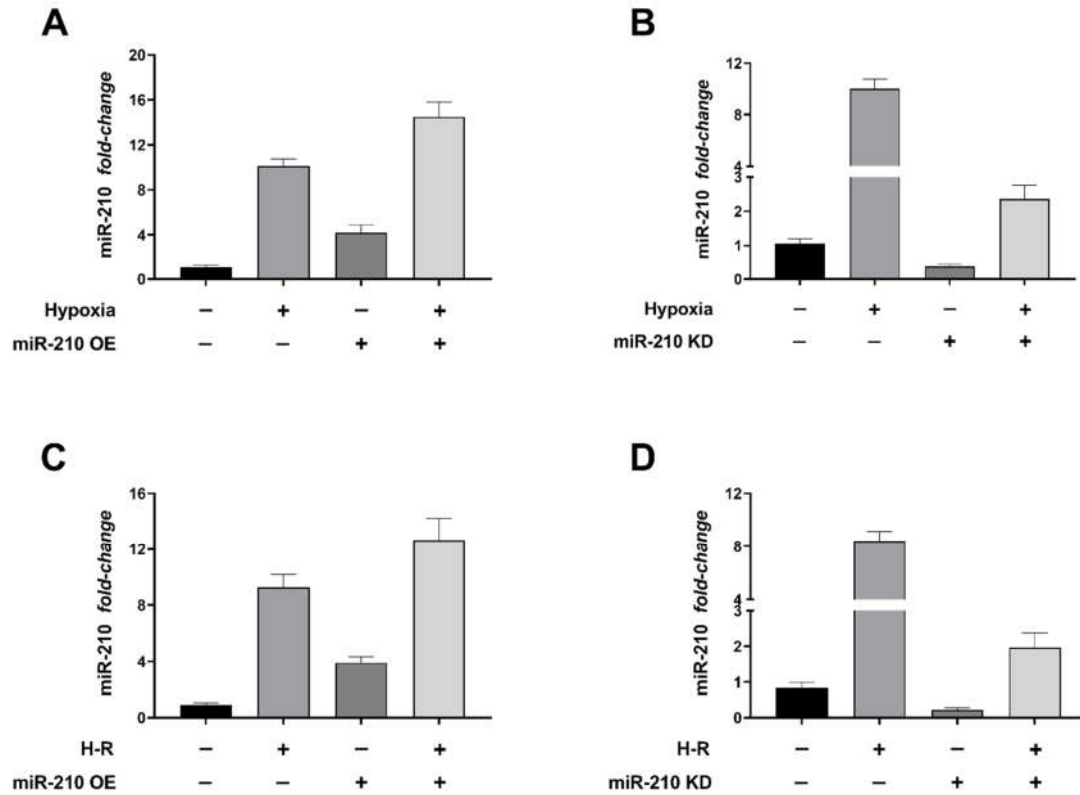

**Supplementary Figure S2: miR-210 hybridization immunoassay validating miR-210 overexpression and miR-210 knockdown in the respective *input* lysates dedicated for the *Apoptosome complex formation* assay.** (A-D) Quantitative miR-210 hybridization immunoassays unequivocally validate the overexpression and knockdown of miR-210 in the respective experimental groups. miR-210 expression levels are depicted as *fold-change*  $\pm$  *S.D* from three (3) technical replicates for each of the four biological replicates belonging to each experimental group (n=4). OE: miR-210 overexpression; KD: miR-210-3p *decoy/inhibitor*; H-R: hypoxia-reoxygenation; S.D: standard deviation

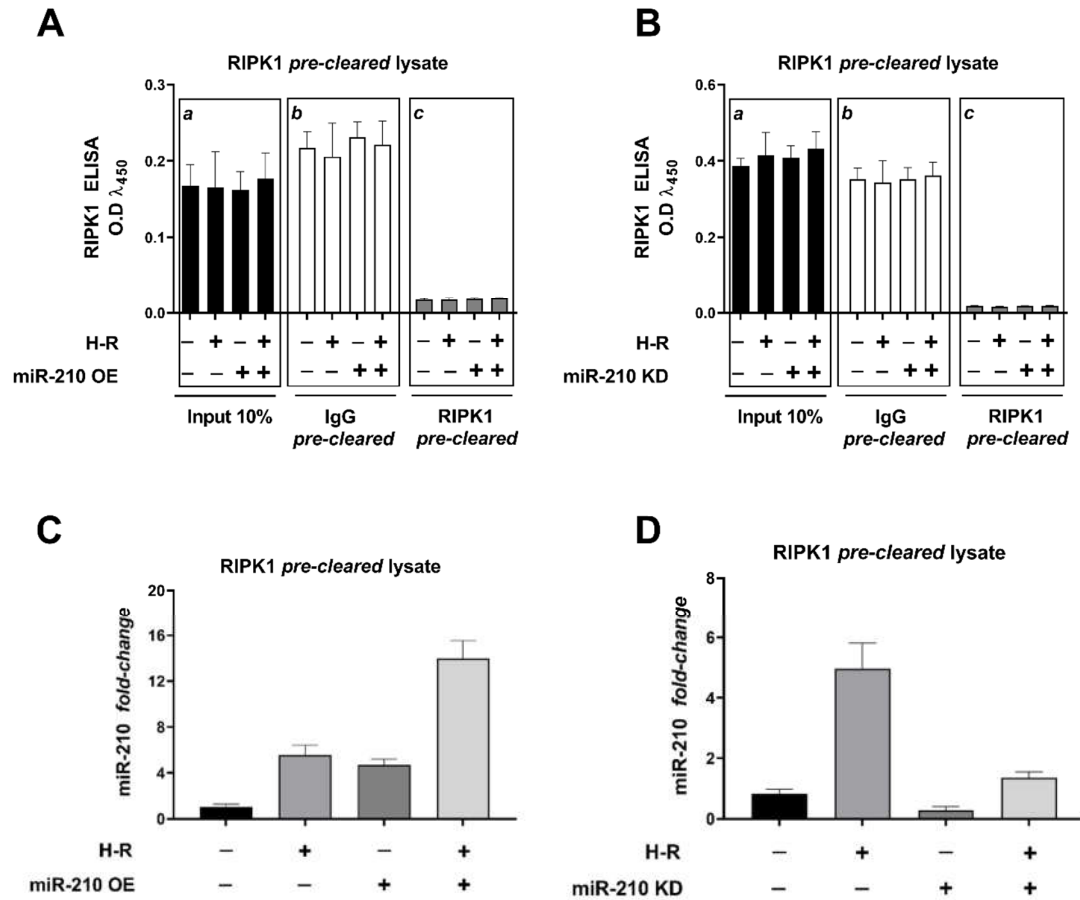

**Supplementary Figure S3: ELISA immunoassays validating the integrity of the *RIPK1*-precleared lysates subjected to FADD immunoprecipitation for the *DISC-IIa* Complex analysis.** (A,B) Quantitative ELISA immunoassays show the relative depletion of RIPK1 in the *RIPK1*-precleared lysates (A inset c and B inset c) compared to the Rabbit IgG precleared lysates (A inset b and B inset b) and the inputs of native lysates (A inset a and B inset a). Data is expressed as experimental blank-corrected absorbances measured at  $\lambda_{450}$  (450 nm). (C,D) miR-210 expression level in the *RIPK1*-precleared lysates was determined by the miR-210 hybridization immunoassay, as described in the Methods. Data is expressed as *Mean*  $\pm$  *SD* from three (3) technical replicates for each of the four biological replicates belonging to each experimental group (n=4). miR-210 expression levels are depicted as *fold-change*  $\pm$  *S.D*

OE: miR-210 overexpression; KD: miR-210-3p *decoy/inhibitor*; H-R: hypoxia-reoxygenation; S.D: standard deviation

**Supplementary Table S1: Composition of the hypoxia medium**

| Component | 500 mL | Final concentration | Source |
|-----------|--------|---------------------|--------|
|-----------|--------|---------------------|--------|

|                                        |           |         | (Notation) |
|----------------------------------------|-----------|---------|------------|
| DMEM, No Glucose                       | 464.45 mL | 93% v/v | 1          |
| Creatine                               | 131.2 mg  | 5 mM    | 2          |
| D-(+)-Glucose Solution 2.5 M, 450 g/L  | 0.55 mL   | 2.75 mM | 3          |
| Glutamine 200 mM                       | 5 mL      | 2 mM    | 4          |
| HEPES 1M                               | 5 mL      | 10 mM   | 5          |
| L-Carnitine, 200 mM                    | 5 mL      | 2 mM    | 6          |
| Non-essential Amino Acids, 100x        | 5 mL      | N/A*    | 7          |
| Sodium Pyruvate 100 mM                 | 5 mL      | 1 mM    | 8          |
| Taurine 500 mM                         | 5 mL      | 5 mM    | 9          |
| Linoleic Acid-Oleic Acid-Albumin, 100x | 5 mL      | N/A*    | 10         |

### Supplementary Table S1: Notation legend

<sup>1</sup> Thermo Fisher Scientific, Oslo, Norway, Catalogue # 11966025

<sup>2</sup> Sigma Aldrich / Merck Millipore / Merck Life Science, Darmstadt, Germany, Catalogue # C3630-100G

<sup>3</sup> Sigma Aldrich / Merck Millipore / Merck Life Science, Oslo, Norway, Catalogue # G8769

<sup>4</sup> Thermo Fisher Scientific, Oslo, Norway, Catalogue # A2916801

<sup>5</sup> Sigma Aldrich / Merck Millipore / Merck Life Science, Darmstadt, Germany, Catalogue # H4034-500G

<sup>6</sup> Sigma Aldrich / Merck Millipore / Merck Life Science, Darmstadt, Germany, Catalogue # C0283-25G

<sup>7</sup> Thermo Fisher Scientific, Oslo, Norway, Catalogue # 11140035

<sup>8</sup> Thermo Fisher Scientific, Oslo, Norway, Catalogue # 11360070

<sup>9</sup> Sigma Aldrich / Merck Millipore / Merck Life Science, Darmstadt, Germany, Catalogue # T8691-100G

<sup>10</sup> Sigma Aldrich / Merck Millipore / Merck Life Science, Darmstadt, Germany, Catalogue # L9655-5ML

\* N/A - Not Applicable
